# Supplementary material
Source: publisher figshare collection journal article supplement (https://karger.figshare.com/ndownloader/files/15540413)
Supplement: Supplementary file 1 [file 15540413]

Supplemental Table 1. Cut-off value of each parameters.

Supplemental Table 2. Classification results of patient specimens by rank classification of LC-1000 for each cytology assessment. (A) Screening group, (B) Detailed examination group.
